# Supplementary material for: Nucleotide Context Can Modulate Promoter Strength in Genes Transcribed by RNA Polymerase III
Source: MDPI journal article supplement (doi:10.3390/genes14040802), 2023-03-27
Supplement: s1 [file s1]

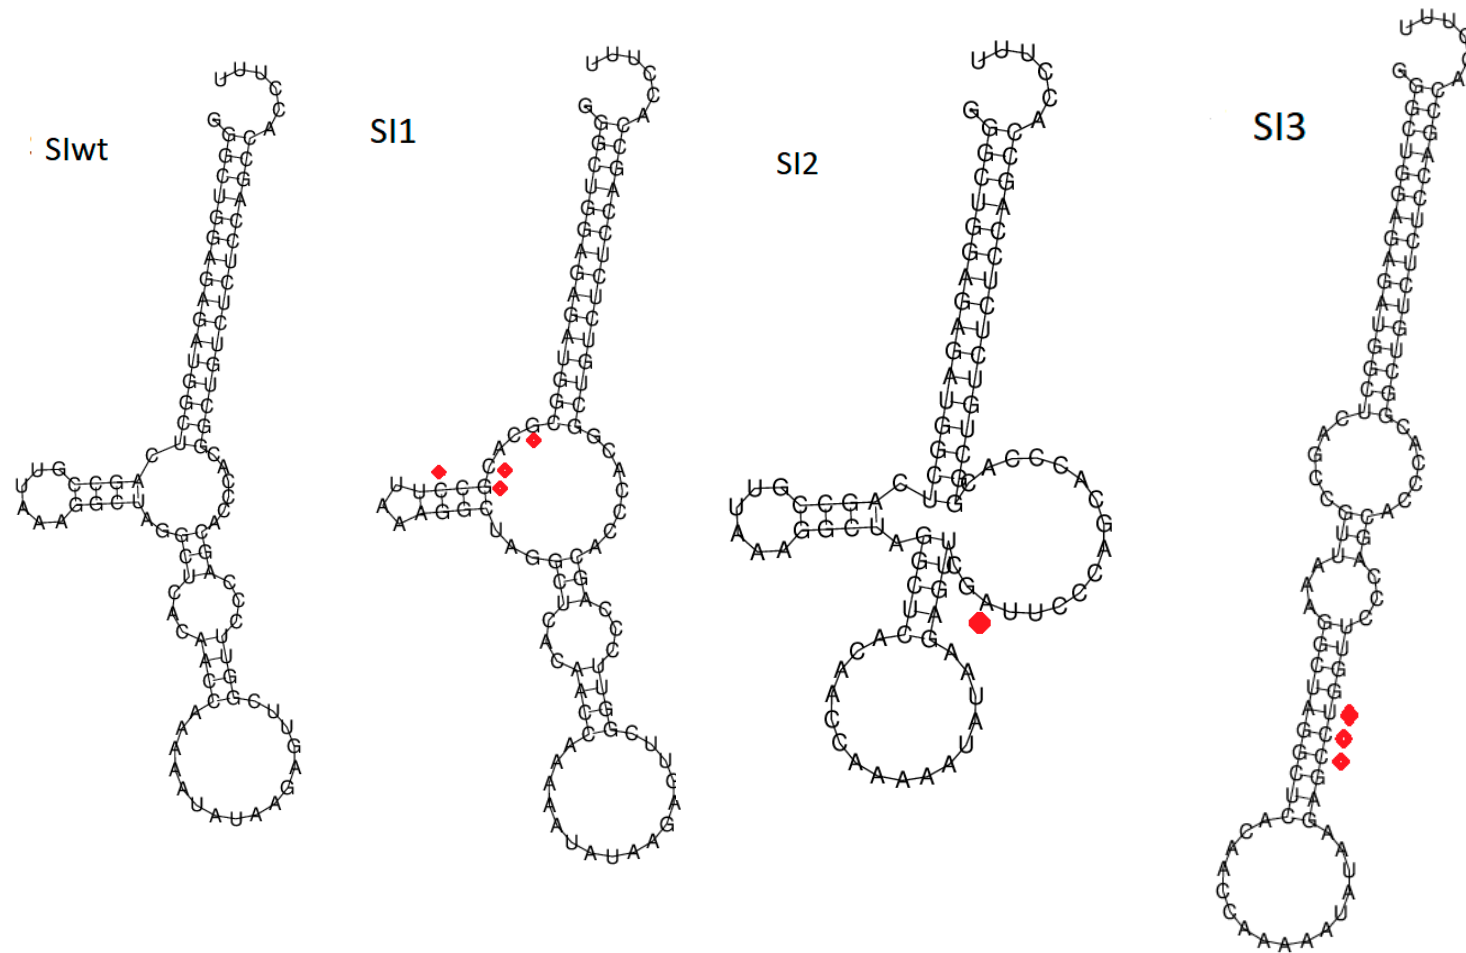

**Figure S2.** Predicted secondary structures of transcripts of 4.5SI gene (SIwt) and its derivatives (constructs SH1, SH2, and SH3). Modified nucleotides are marked with red diamonds. Note a long stem formed by terminal regions in all transcripts.
