# Supplementary material for: Nucleotide Context Can Modulate Promoter Strength in Genes Transcribed by RNA Polymerase III
Source: MDPI journal article supplement (doi:10.3390/genes14040802), 2023-03-27
Supplement: s1 [file s1]

|                                                                                 |    |    |    |
|---------------------------------------------------------------------------------|----|----|----|
| 1                                                                               | 20 | 40 | 60 |
| TCTC <u>GGCATTGACTAGTT</u> CGAGGTAATCACGATGATAGCTCTGTACGTATGATAATACTGATCGTAGGTC |    |    |    |
| 80                                                                              |    |    |    |
| TGCTCAGTAGCAAGCGAACTAGTCAATGC                                                   |    |    |    |

T 3'

**Figure S1.** Structure of pU1. A random 96 bp nucleotide sequence was cloned into pGeneClip for its transcription by RNA-polymerase II governed by the promotor and terminator of the U1 RNA gene in the vector. The transcription starts with G at position 1. The complementary regions of the insertion that form a double-stranded structure in the transcript are underlined. The complementary sequence used for the PCR primer to synthesize the labeled probe is highlighted in yellow.
