# Supplementary material for: Nucleotide Context Can Modulate Promoter Strength in Genes Transcribed by RNA Polymerase III
Source: MDPI journal article supplement (doi:10.3390/genes14040802), 2023-03-27
Supplement: s1 [file s1]

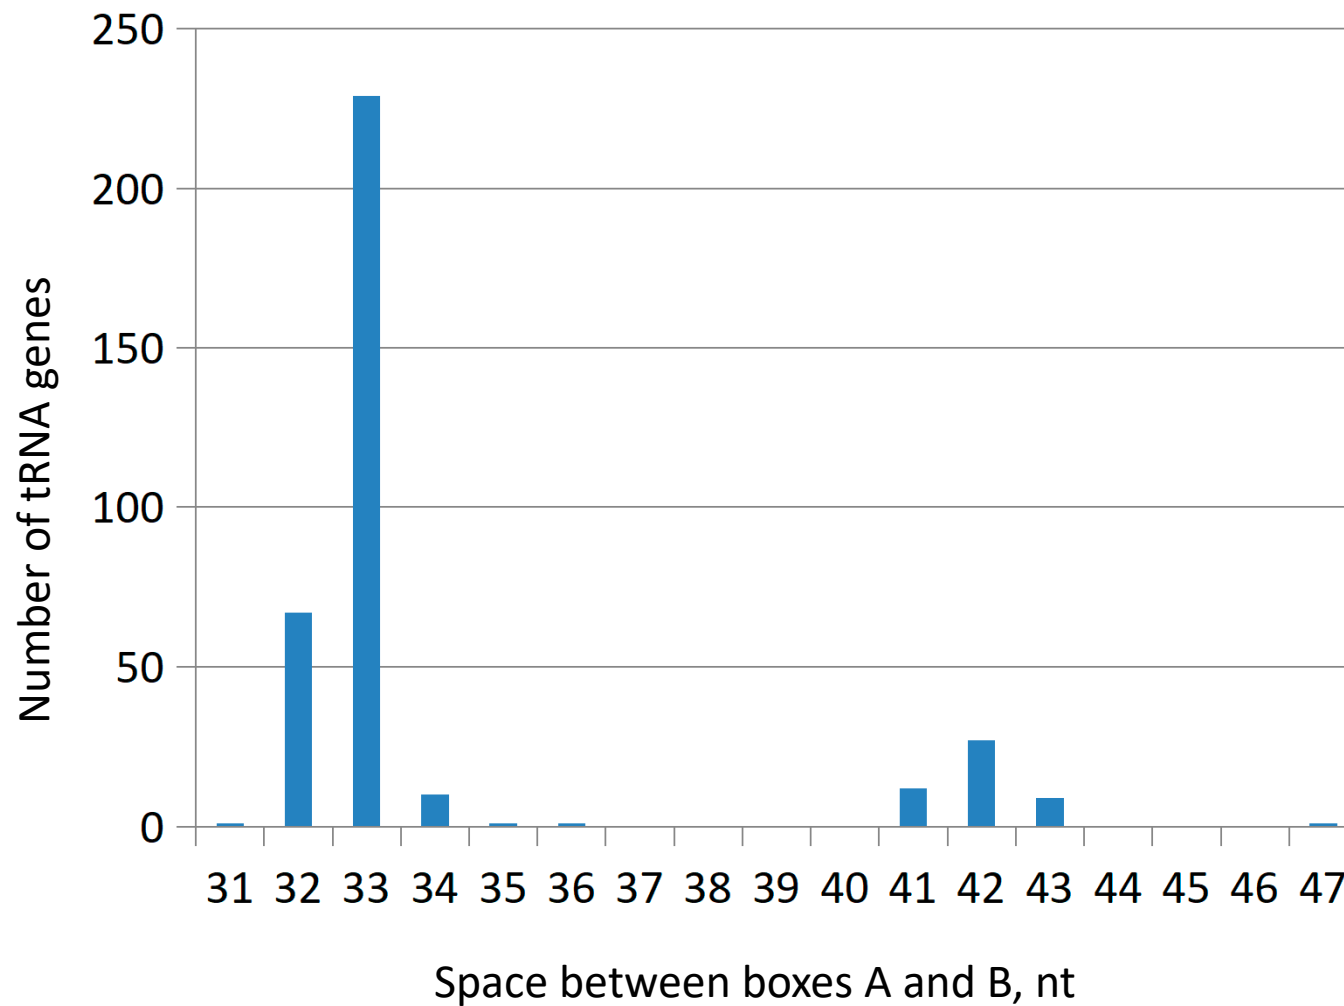

**Figure S6.** Lengths of spacers between boxes A and B of RNA polymerase III internal promoters in 359 human tRNA genes.
