# Supplementary material for: Nucleotide Context Can Modulate Promoter Strength in Genes Transcribed by RNA Polymerase III
Source: MDPI journal article supplement (doi:10.3390/genes14040802), 2023-03-27
Supplement: s1 [file s1]

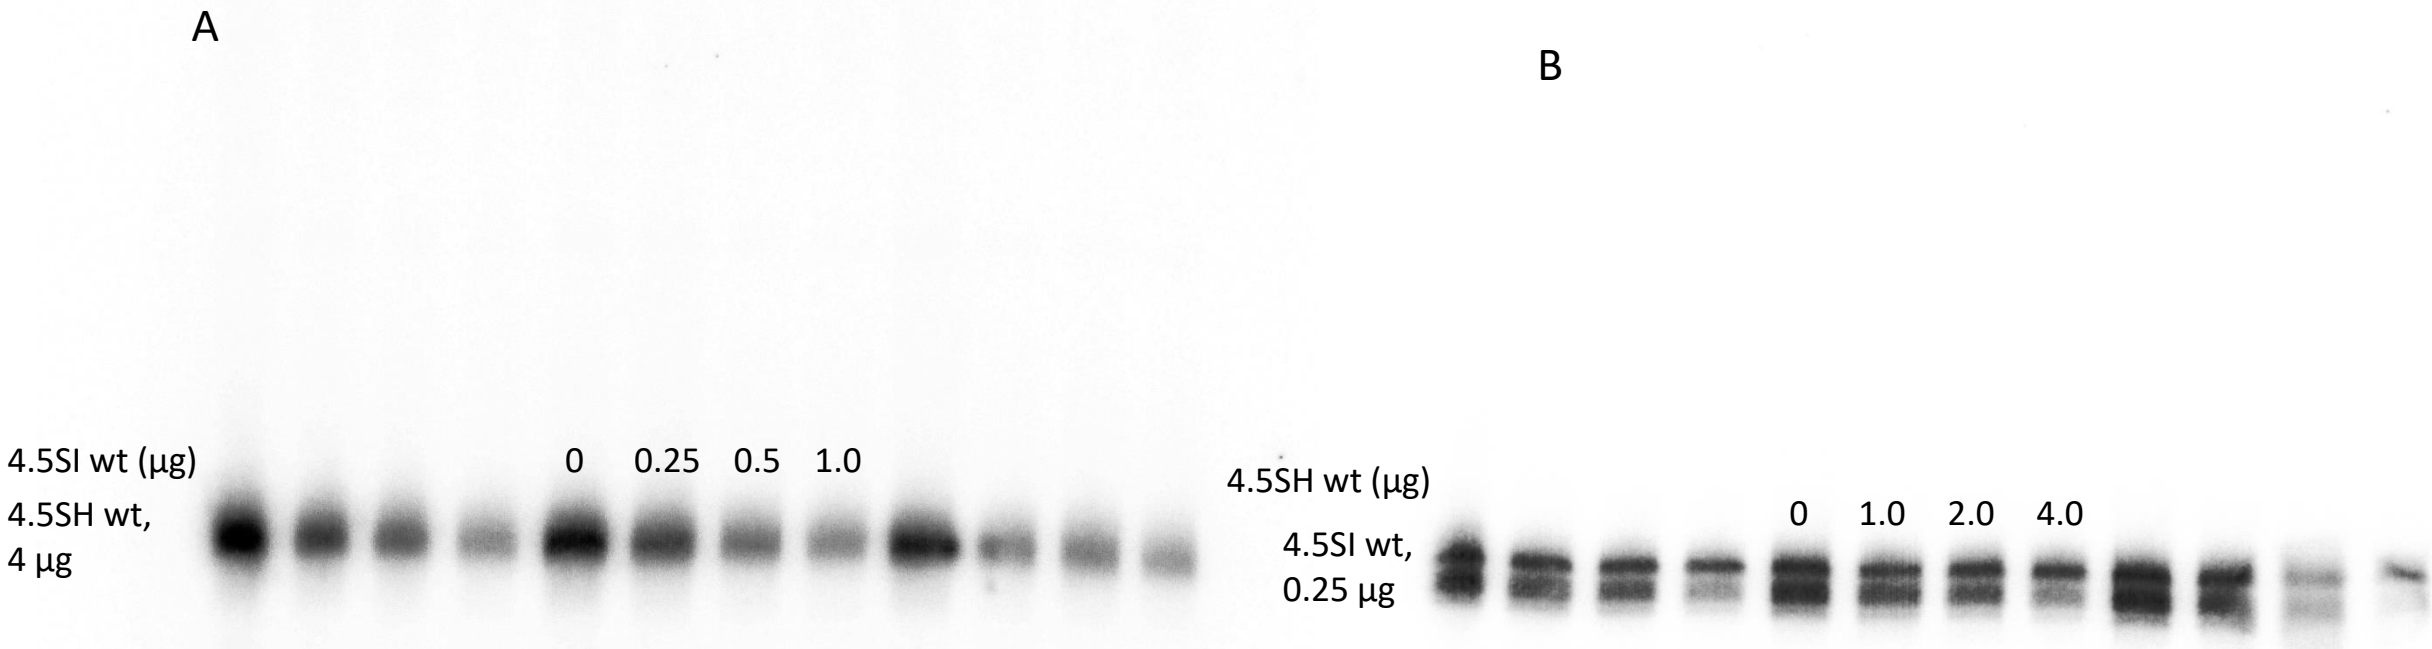

**Figure S4.** The original images of northern blot hybridization of three transfection replicates. (For figures 6A and 6B in the main text).

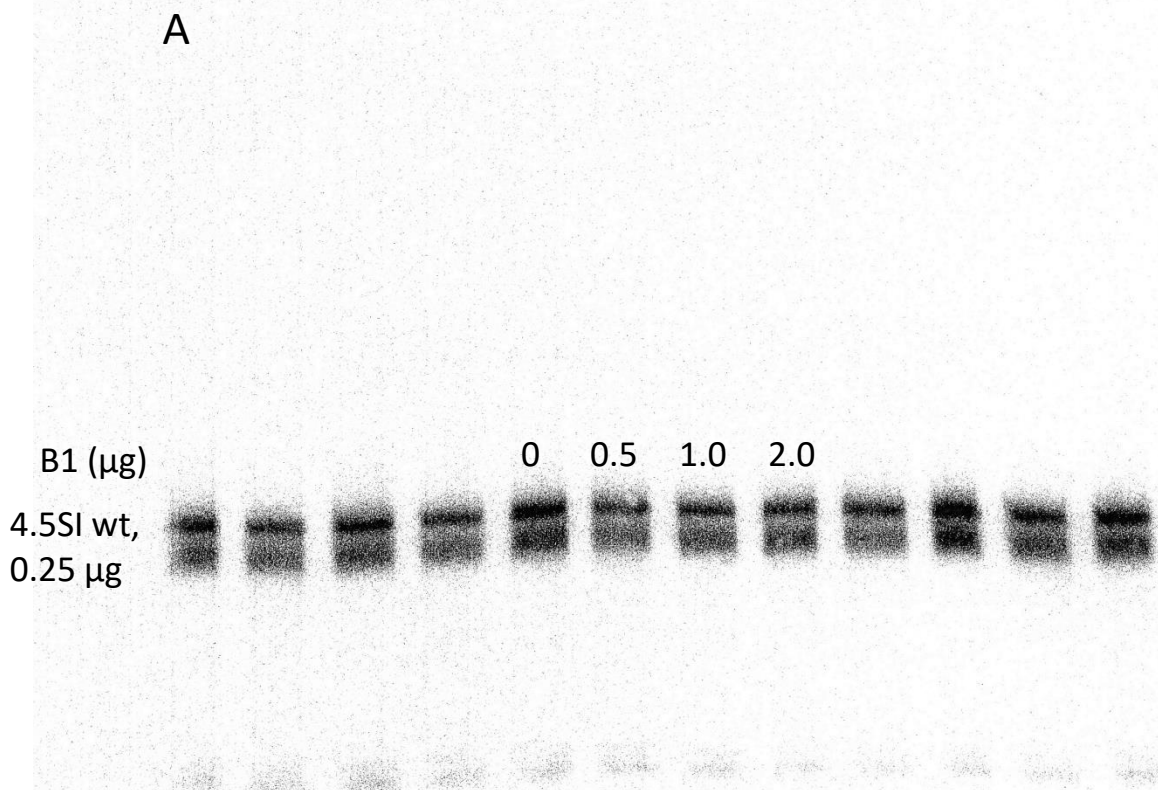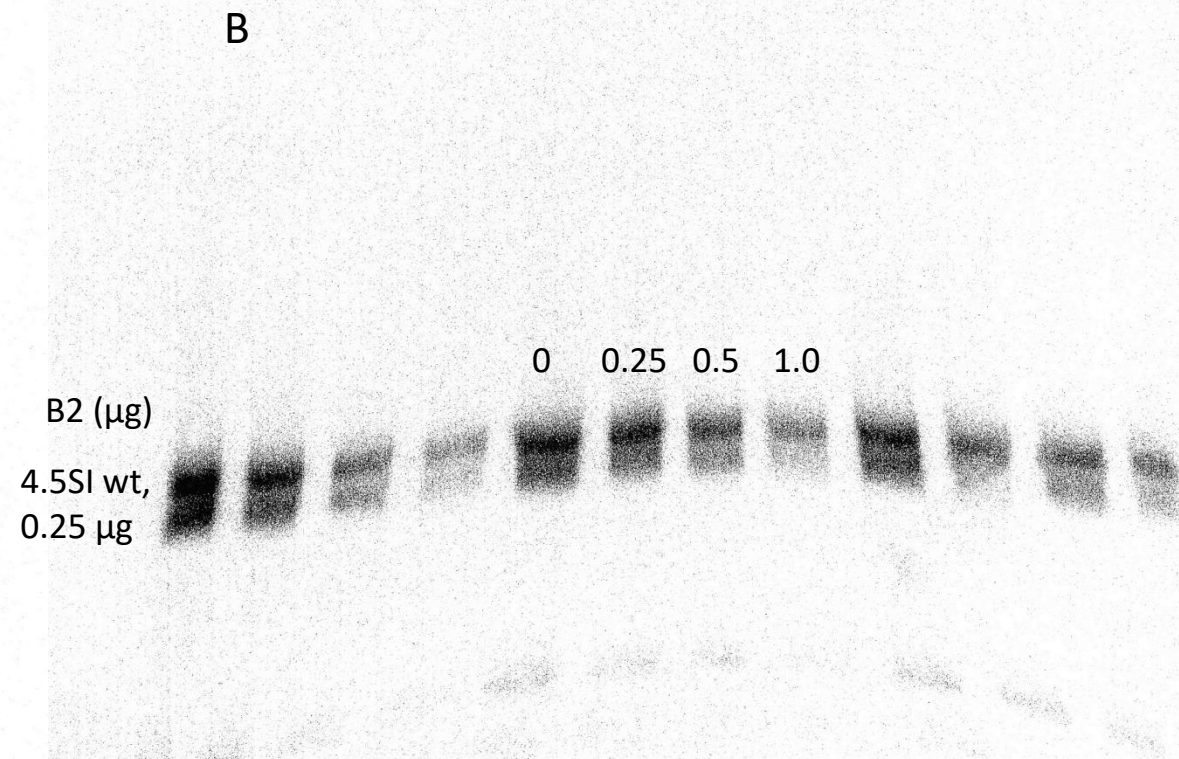

**Figure S4**, continued. The original images of northern blot hybridizations of three transfection replicates. (For figures 7A and 7B in the main text).

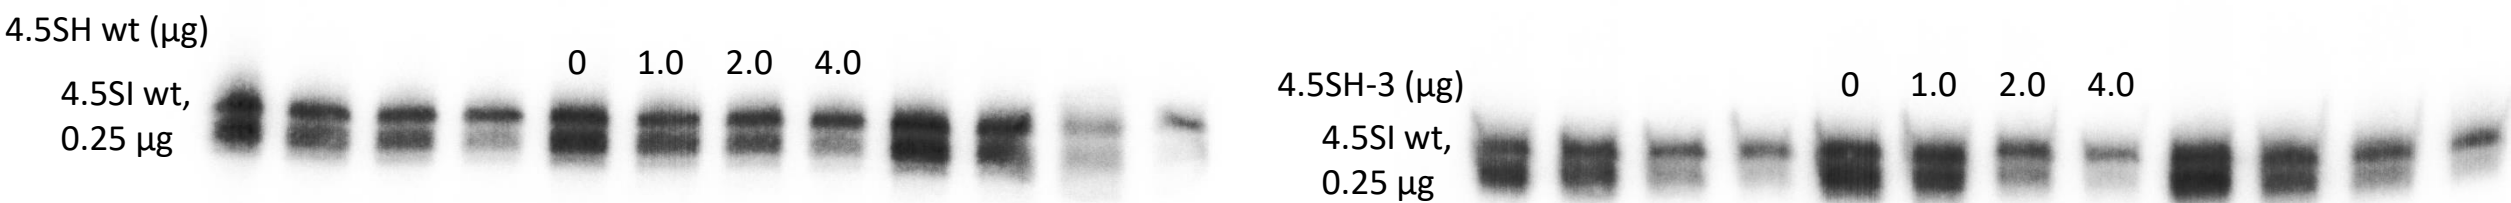

**Figure S4**, continued. The original images of northern blot hybridizations of three transfection replicates. (For two left blots in figure 8 of the main text).

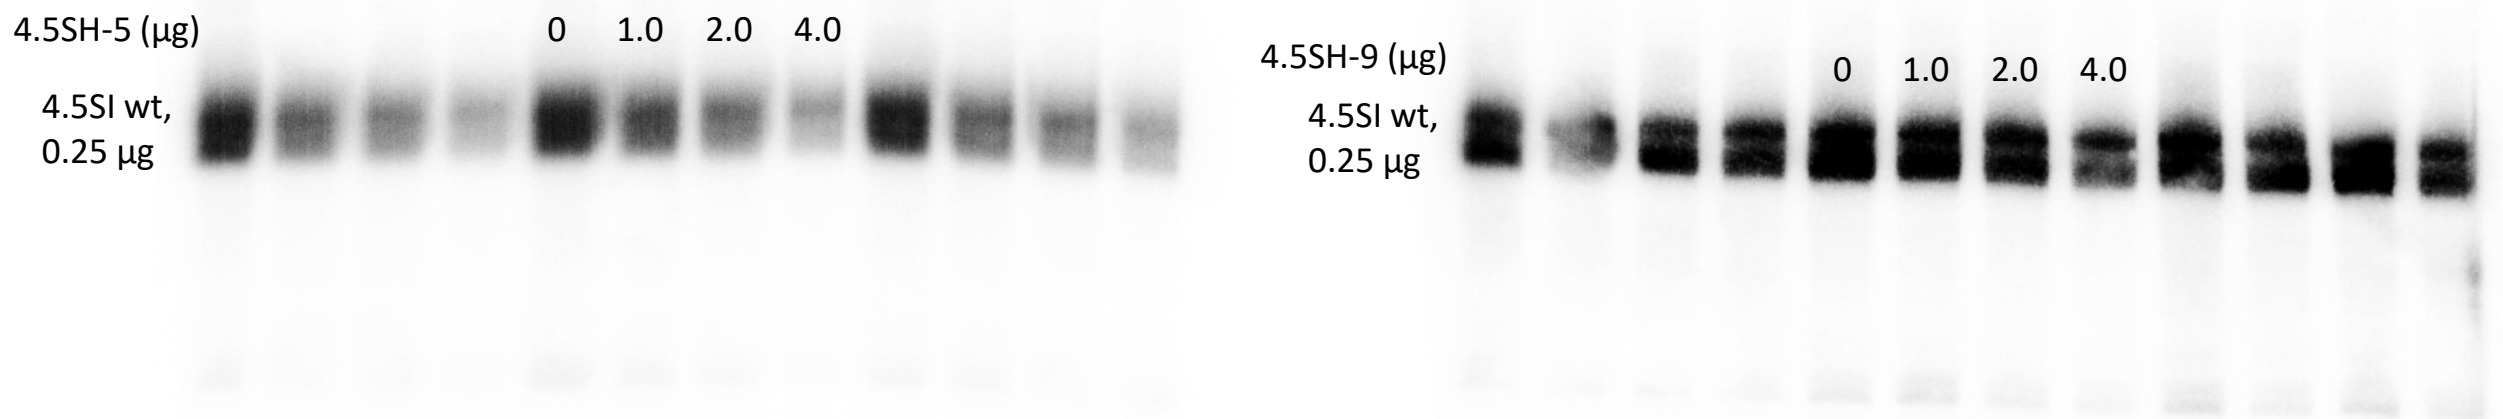

**Figure S4**, continued. The original images of northern blot hybridizations of three transfection replicates. (For two right blots in figure 8 of the main text).
